# Supplementary material for: Estimating the age of the p.Cys433Arg variant in the MYOC gene in patients with primary open-angle glaucoma
Source: PubMed Central journal article supplement (PMC6239314; doi:10.1371/journal.pone.0207409), 2018-11-16
Supplement: pone.0207409.s001.pdf [file pone.0207409.s001.pdf]

| <b>Marker</b> | <b>Physical Distance<br/>among markers (Kb)</b> | <b>Physical Distance<br/>among <i>MYOC</i> gene (Kb)</b> |
|---------------|-------------------------------------------------|----------------------------------------------------------|
| rs6133        | 0                                               | 2070071                                                  |
| rs3221612     | 751618                                          | 1318451                                                  |
| rs3219828     | 543981                                          | 774468                                                   |
| rs2266782     | 216017                                          | 558451                                                   |
| rs2266780     | 6276                                            | 552175                                                   |
| rs2234708     | 16782                                           | 13350                                                    |
| D1S2815       | 92852                                           | 62236                                                    |
| D1S1165       | 86030                                           | 148599                                                   |
| rs3223566     | 1222531                                         | 1371601                                                  |
| rs3220994     | 948238                                          | 2319841                                                  |
| rs3220452     | 399822                                          | 2719665                                                  |
| rs3219958     | 130923                                          | 2850590                                                  |

 ***MYOC* gene**
