# Supplementary material for: Estimating the age of the p.Cys433Arg variant in the MYOC gene in patients with primary open-angle glaucoma
Source: PubMed Central journal article supplement (PMC6239314; doi:10.1371/journal.pone.0207409), 2018-11-16
Supplement: pone.0207409.s002.pdf [file pone.0207409.s002.pdf]

**Haplotypes – Families**

| Number | rs6133 | rs3221612 | rs3219828 | rs2266782 | rs2266780 | rs74315338 | rs2234708 | D1S2815 | D1S1165 | rs3223566 | rs3220994 | rs3220452 | rs3219958 |
|--------|--------|-----------|-----------|-----------|-----------|------------|-----------|---------|---------|-----------|-----------|-----------|-----------|
| 1      | C      | 1         | 2         | G         | A         | C          | 1         | 1       | 1       | 1         | 1         | 2         | 1         |
| 2      | C      | 1         | 1         | G         | A         | C          | 1         | 1       | 1       | 1         | 1         | 1         | 1         |
| 3      | C      | 2         | 1         | G         | A         | C          | 1         | 1       | 1       | 1         | 1         | 1         | 1         |

**Haplotypes – Unrelated patients**

|    |   |   |   |   |   |   |   |   |   |   |   |   |   |
|----|---|---|---|---|---|---|---|---|---|---|---|---|---|
| 1  | C | 1 | 2 | G | A | C | 1 | 5 | 5 | 2 | 1 | 2 | 1 |
| 2  | C | 1 | 2 | G | A | C | 1 | 4 | 1 | 3 | 1 | 1 | 3 |
| 3  | C | 7 | 2 | G | A | C | 1 | 1 | 1 | 2 | 1 | 1 | 4 |
| 4  | C | 1 | 2 | G | A | C | 1 | 6 | 6 | 5 | 1 | 5 | 1 |
| 5  | C | 1 | 2 | A | A | C | 1 | x | 3 | x | 1 | 1 | 1 |
| 6  | C | 4 | 2 | A | A | C | 1 | 3 | 3 | 4 | 4 | 1 | 6 |
| 7  | C | 1 | 2 | A | A | C | 1 | 3 | 3 | x | 3 | 1 | 5 |
| 8  | C | 8 | 1 | A | A | C | 1 | 4 | 4 | 1 | 1 | 2 | 1 |
| 9  | C | 1 | 2 | G | A | C | 2 | 6 | 5 | 2 | 1 | 2 | 1 |
| 10 | C | 3 | 1 | G | A | C | 3 | 4 | 1 | 3 | 1 | 2 | 1 |
| 11 | C | 7 | 3 | G | A | C | 5 | 3 | 4 | 4 | 1 | 6 | 5 |
| 12 | C | 3 | 3 | G | A | C | 5 | 1 | 3 | 3 | 2 | 2 | 2 |
| 13 | C | 7 | 2 | G | A | C | 5 | 5 | 1 | 4 | 4 | 6 | 1 |
| 14 | C | 8 | 2 | A | G | C | 1 | x | 6 | x | 1 | 3 | 3 |
| 15 | C | 1 | 4 | A | G | C | 2 | 6 | 2 | 2 | 1 | 2 | 1 |
| 16 | C | 5 | 1 | A | G | C | 5 | 6 | 2 | 5 | 4 | 5 | 1 |
