# Supplementary material for: Estimating the age of the p.Cys433Arg variant in the MYOC gene in patients with primary open-angle glaucoma
Source: PubMed Central journal article supplement (PMC6239314; doi:10.1371/journal.pone.0207409), 2018-11-16
Supplement: pone.0207409.s003.pdf [file pone.0207409.s003.pdf]

| Number of individuals<br>with each haplotype | Haplotype frequency (%) | <i>MYOC</i><br>gene |           |           |            |           |
|----------------------------------------------|-------------------------|---------------------|-----------|-----------|------------|-----------|
|                                              |                         | rs3219828           | rs2266782 | rs2266780 | rs74315338 | rs2234708 |
| 6                                            | 9.23                    | 4                   | A         | A         | T          | 2         |
| 3                                            | 4.61                    | 2                   | A         | A         | T          | 3         |
| 2                                            | 3.08                    | 2                   | A         | A         | T          | 5         |
| 1                                            | 1.54                    | 4                   | A         | A         | T          | 6         |
| 1                                            | 1.54                    | 2                   | A         | A         | T          | 1         |
| 1                                            | 1.54                    | 5                   | A         | A         | T          | 7         |
| 1                                            | 1.54                    | 5                   | A         | A         | T          | 2         |
| 1                                            | 1.54                    | 4                   | A         | A         | T          | 3         |
| 5                                            | 7.69                    | 4                   | A         | A         | T          | 4         |
| 4                                            | 6.15                    | 3                   | A         | A         | T          | 4         |
| 3                                            | 4.61                    | 2                   | A         | A         | T          | 4         |
| 1                                            | 1.54                    | 1                   | A         | A         | T          | 4         |
| 3                                            | 4.61                    | 1                   | G         | A         | T          | 4         |
| 1                                            | 1.54                    | 5                   | G         | A         | T          | 4         |
| 4                                            | 6.15                    | 2                   | G         | A         | T          | 4         |
| 6                                            | 9.23                    | 1                   | G         | A         | T          | 1         |
| 4                                            | 6.15                    | 2                   | G         | A         | T          | 3         |
| 7                                            | 10.77                   | 4                   | G         | A         | T          | 2         |
| 1                                            | 1.54                    | 5                   | G         | A         | T          | 6         |
| 1                                            | 1.54                    | 3                   | G         | A         | T          | 3         |
| 1                                            | 1.54                    | 5                   | G         | A         | T          | 5         |
| 1                                            | 1.54                    | 2                   | G         | A         | T          | 1         |
| 1                                            | 1.54                    | 3                   | G         | A         | T          | 2         |
| 1                                            | 1.54                    | 2                   | G         | A         | T          | 2         |
| 1                                            | 1.54                    | 6                   | G         | A         | T          | 2         |
| 1                                            | 1.54                    | 4                   | G         | A         | T          | 6         |
| 1                                            | 1.54                    | 4                   | G         | G         | T          | 2         |
| 1                                            | 1.54                    | 4                   | A         | G         | T          | 3         |
| 1                                            | 1.54                    | 3                   | A         | G         | T          | 3         |
